# Supplementary material for: Synthesis, characterization and cytotoxic activity of cationic half-sandwich Ru(ii) complexes stabilized by iminophosphorane N,N,S and N,N,Se tridentate ligands
Source: Royal Society of Chemistry journal article supplement (doi:10.1039/d0nj04958a), 2020-01-01
Supplement: d0nj04958a1.pdf [file d0nj04958a1.pdf]

## Supporting Information

New Journal of Chemistry

### Synthesis, characterization and cytotoxic activity of cationic half-sandwich Ru(II) complexes stabilized by iminophosphorane N,N,S and N,N,Se tridentate ligands

Carla Gabriela Martínez-De-León<sup>a</sup>, Rosario del Carmen Flores Vallejo<sup>b</sup>, Aurora Rodríguez-Álvarez<sup>a</sup>, María Luisa Villareal<sup>b</sup> and Jean-Michel Grévy<sup>a\*</sup>

<sup>a</sup>*Centro de Investigaciones Químicas, Instituto de Investigación en Ciencias Básicas y Aplicadas, Universidad Autónoma del Estado de Morelos, Avenida Universidad # 1001, Chamilpa, CP 62209 Cuernavaca, Morelos, México.*

<sup>b</sup>*Centro de Investigación en Biotecnología (CEIB), Universidad Autónoma del Estado de Morelos, Avenida Universidad # 1001, Chamilpa, CP 62209 Cuernavaca, Morelos, México.*

#### 1. Mass Spectra (FAB<sup>+</sup>) for compounds **10** and **11**.

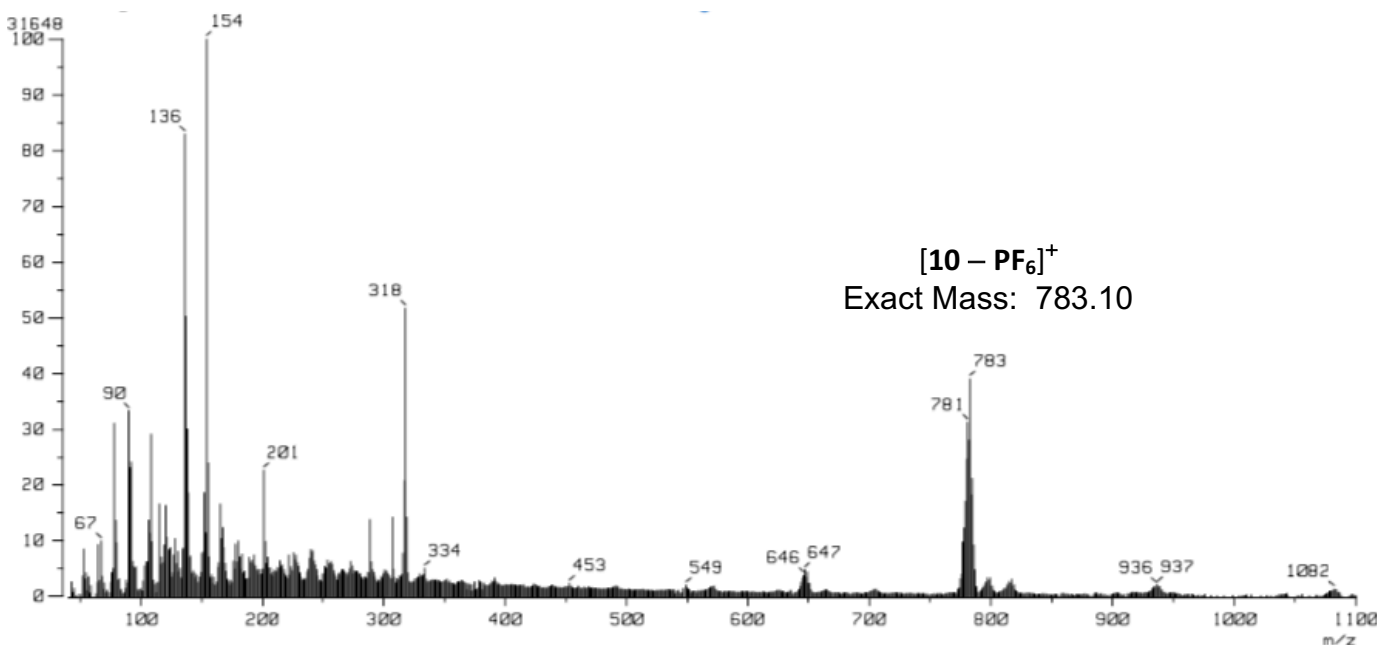

Figure S1. Mass Spectrum (FAB<sup>+</sup>) for compound **10**.

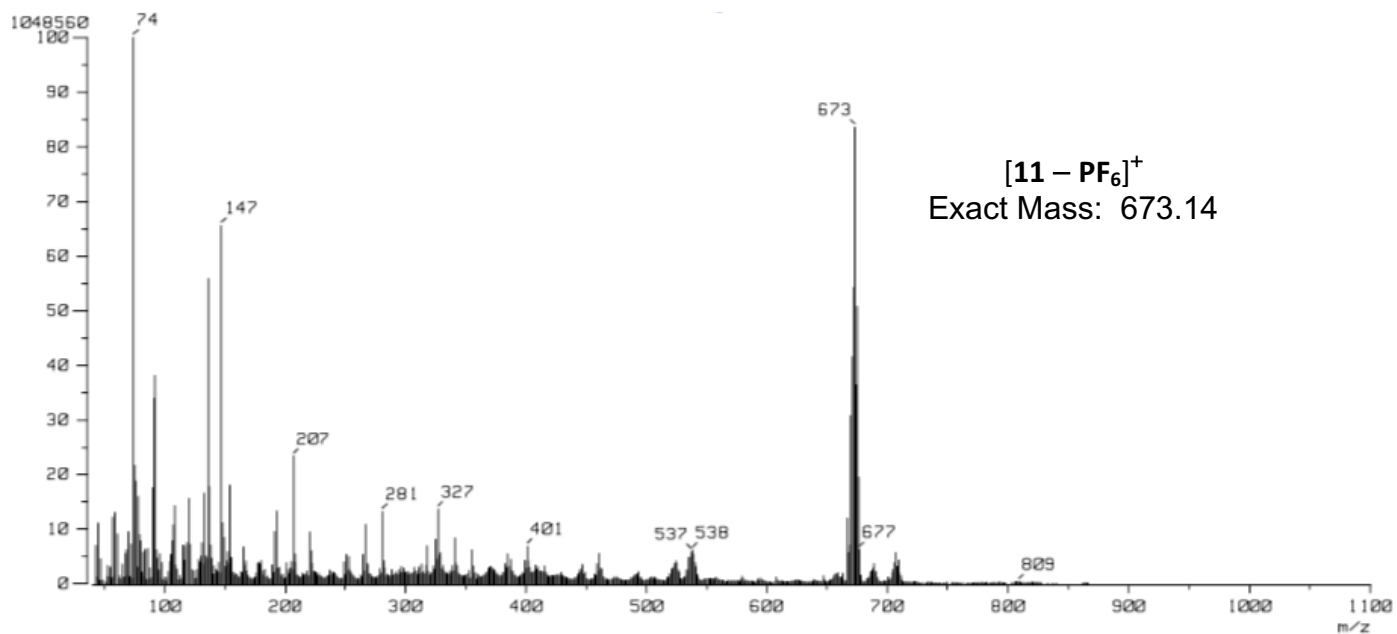

Figure S2. Mass Spectrum (FAB<sup>+</sup>) for compound **11**.

2. <sup>31</sup>P-{<sup>1</sup>H}, <sup>1</sup>H and <sup>13</sup>C NMR spectra for compound **6**

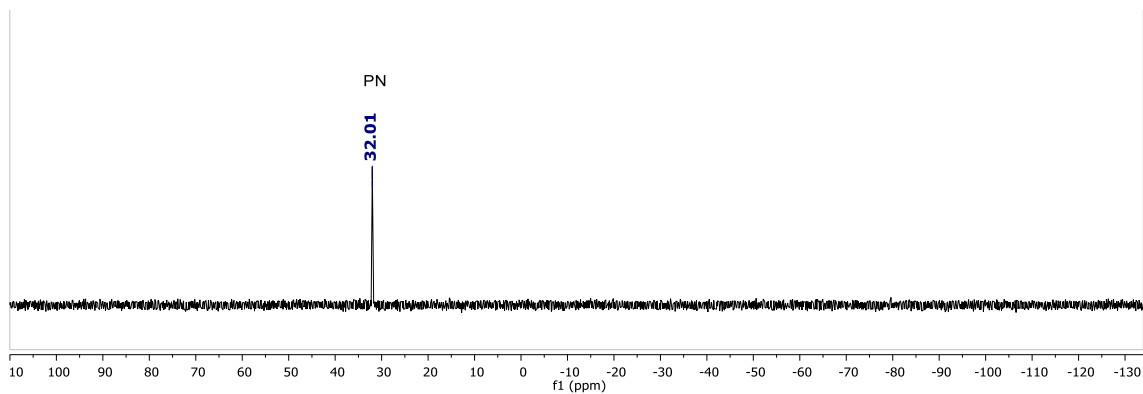

Figure S3. <sup>31</sup>P-{<sup>1</sup>H} NMR spectrum for compound **6** in CDCl<sub>3</sub> (202 MHz).

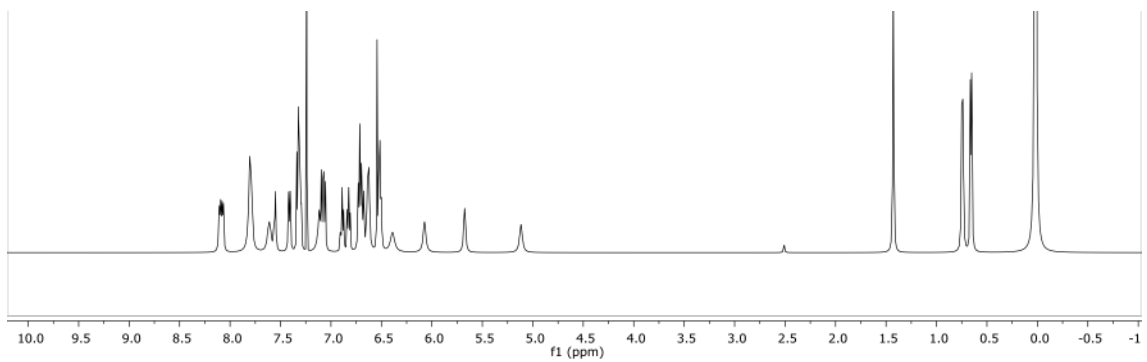

Figure S4.  $^1\text{H}$  NMR spectrum for compound **6** in  $\text{CDCl}_3$  (500 MHz).

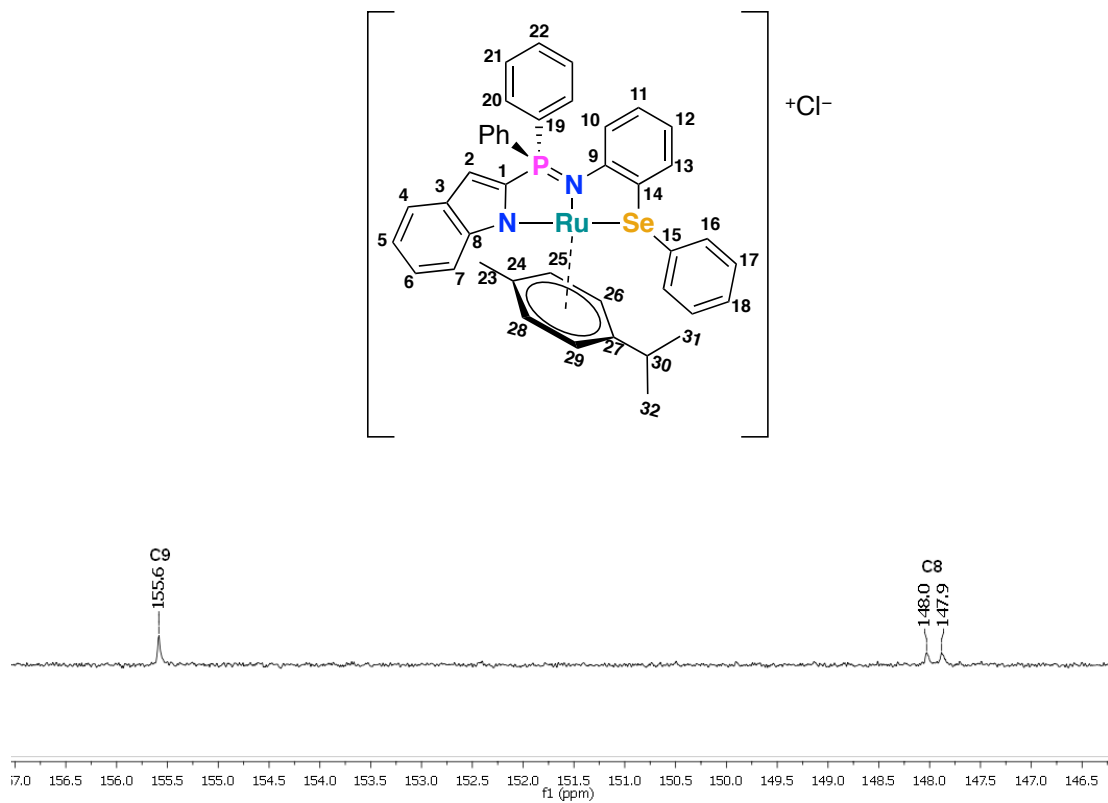

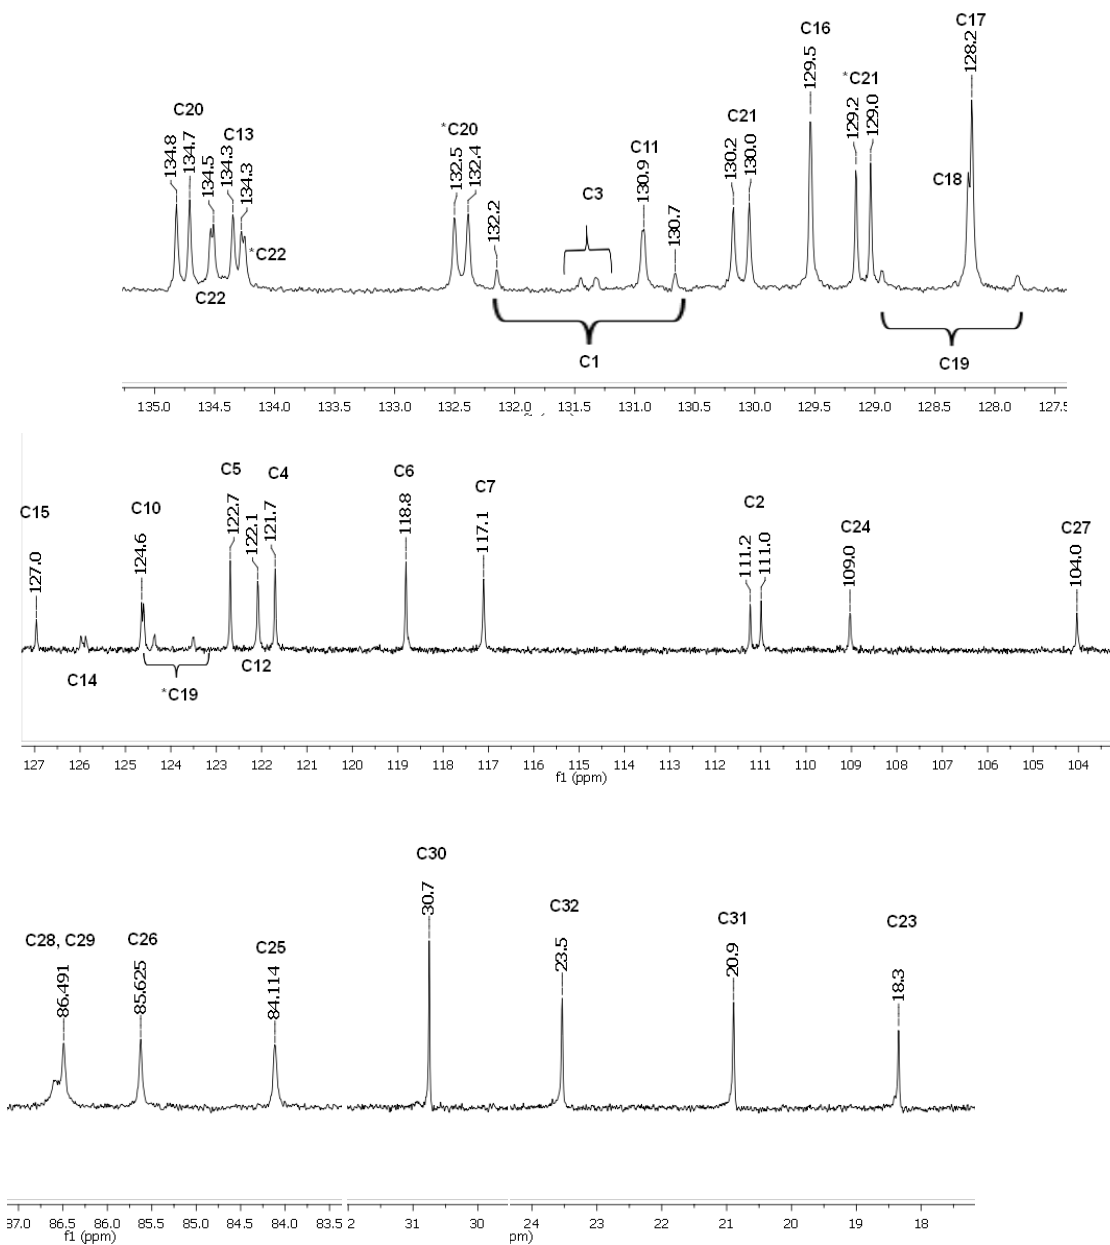

Figure S5.  $^{13}\text{C}$  NMR spectrum for compound **6** in  $\text{CDCl}_3$  (125 MHz).

3.  $^{31}\text{P}\{-^1\text{H}\}$  spectra for compound **9**, **10** and **12**

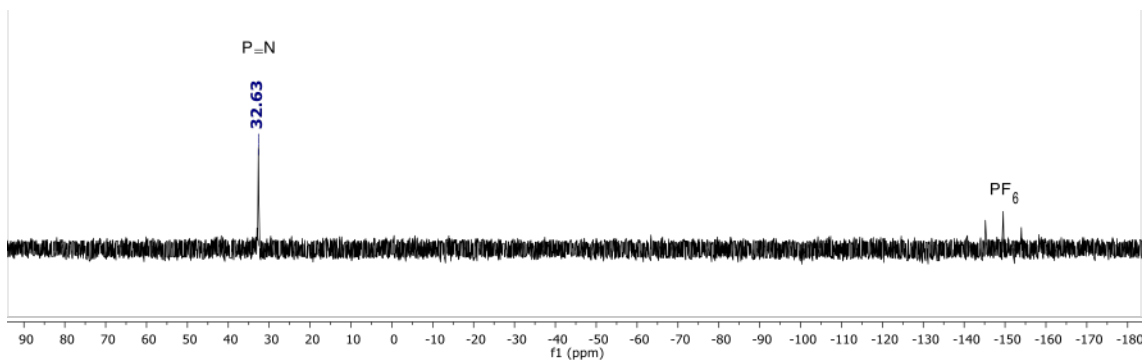

Figure S6.  $^{31}\text{P}\{-^1\text{H}\}$  NMR spectrum for compound **9** in  $\text{CDCl}_3$  (202 MHz).

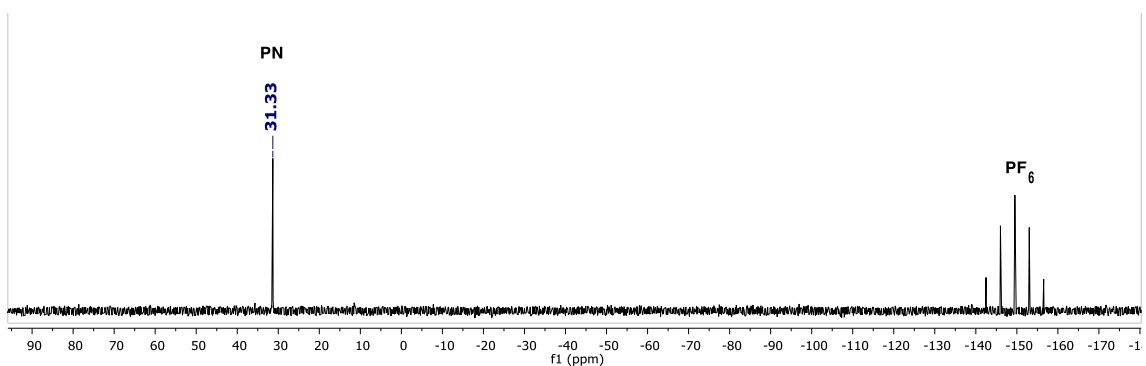

Figure S7.  $^{31}\text{P}\{-^1\text{H}\}$  NMR spectrum for compound **10** in  $\text{CDCl}_3$  (202 MHz).

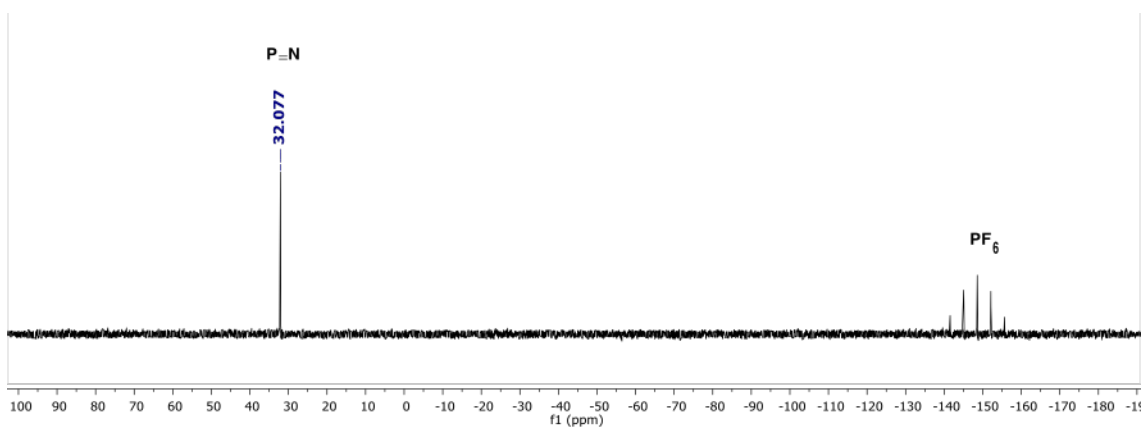

Figure S8.  $^{31}\text{P}\{-^1\text{H}\}$  NMR spectrum for compound **12** in  $\text{CDCl}_3$  (202 MHz).

4.  $^{31}\text{P}$ - $\{^1\text{H}\}$ ,  $^1\text{H}$  and  $^{13}\text{C}$  NMR spectra for compound **11**

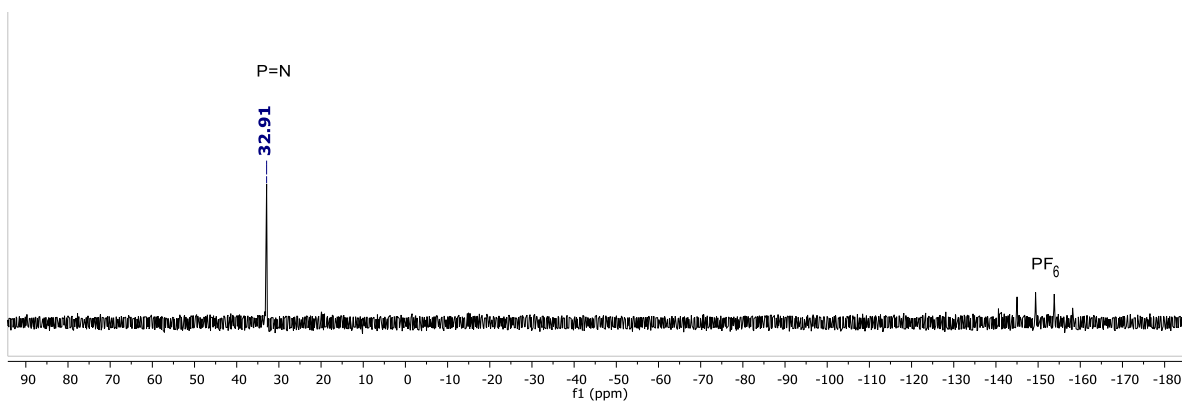

Figure S9.  $^{31}\text{P}$ - $\{^1\text{H}\}$  NMR spectrum for compound **11** in  $\text{CDCl}_3$  (202 MHz).

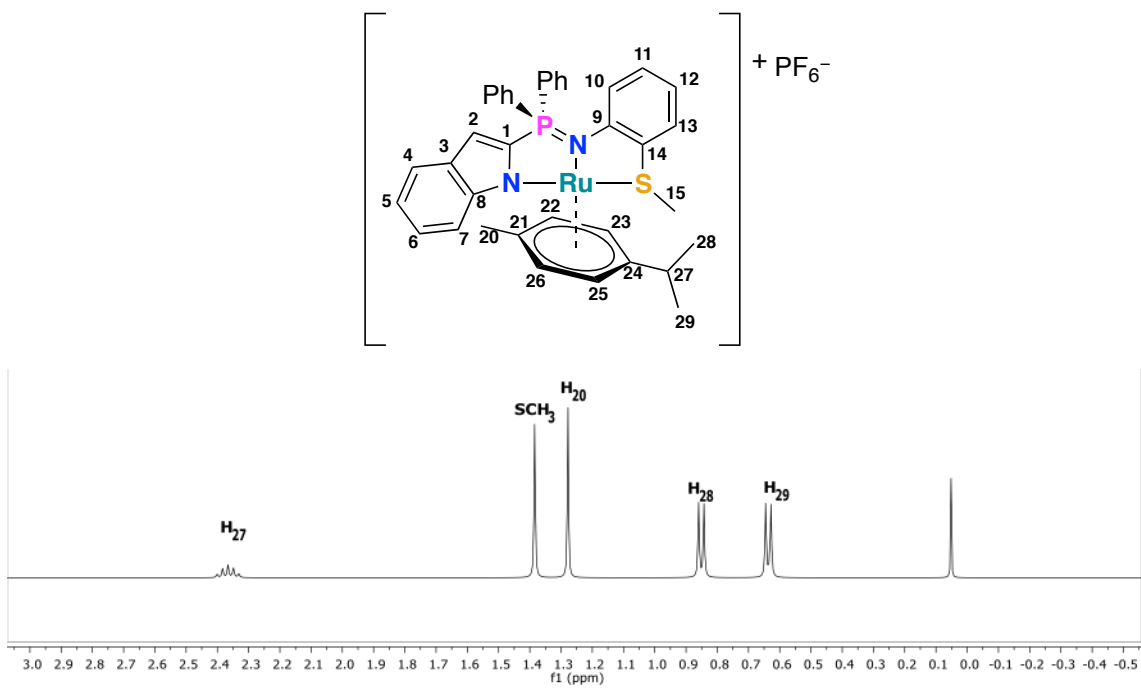

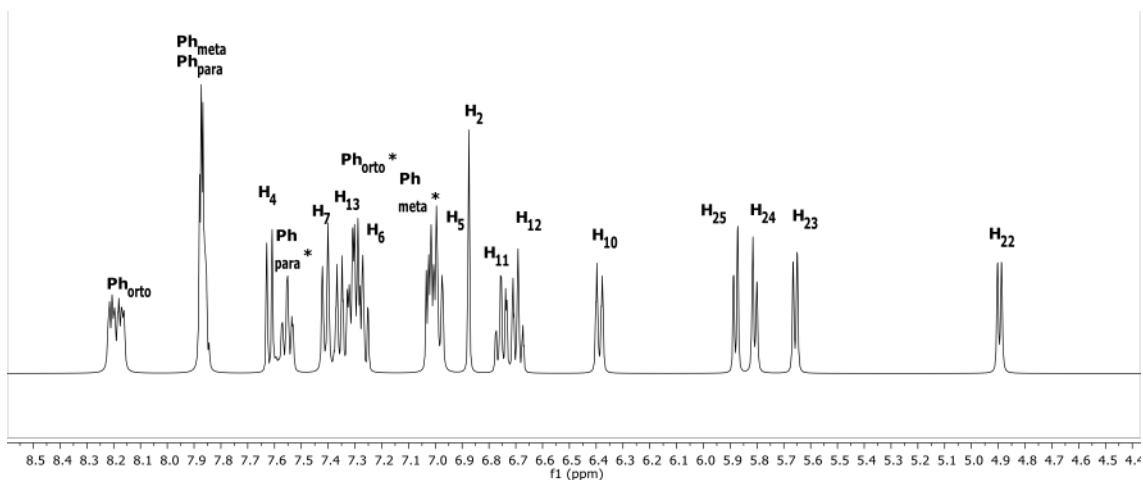

Figure S10.  $^1\text{H}$  NMR spectra for compound **11** in  $\text{CDCl}_3$  (500 MHz).

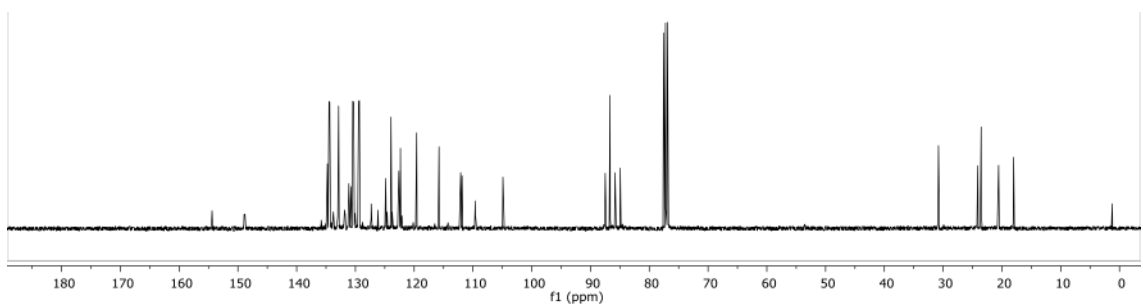

Figure S11.  $^{13}\text{C}$  NMR spectra for compound **11** in  $\text{CDCl}_3$  (125 MHz).

## 5. Solubility of Ru(II) compounds

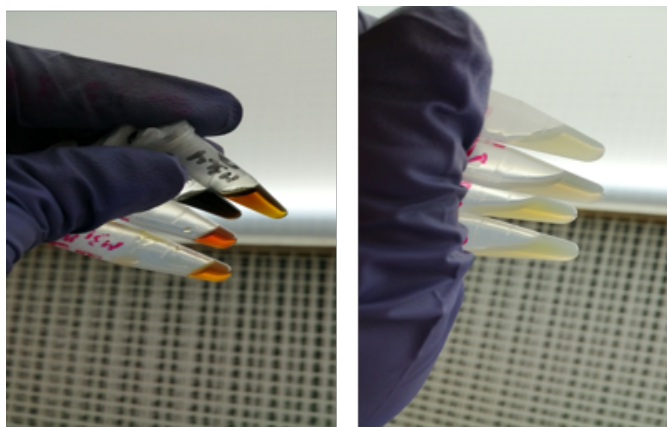

Figure S12. Solubility of Ru compounds. A) Dissolved in DMSO: Tween 80 solution (1:1 v/v) and B) further diluted with MilliQ® water

## 6. Stability of compound **11** in DMSO+H<sub>2</sub>O

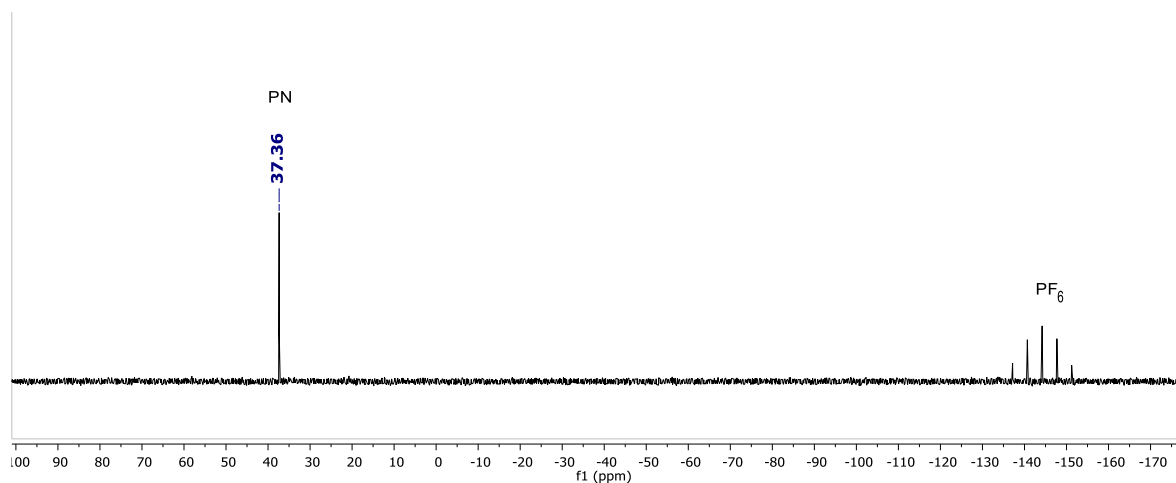

Figure S13. <sup>31</sup>P-<sup>1</sup>H} NMR spectrum for the precipitate formed by adding H<sub>2</sub>O to a DMSO solution of compound **11** (CH<sub>2</sub>Cl<sub>2</sub>, 202 MHz).

## 7. Stability of compounds **9** and **10** in stock solutions containing polysorbate 80.

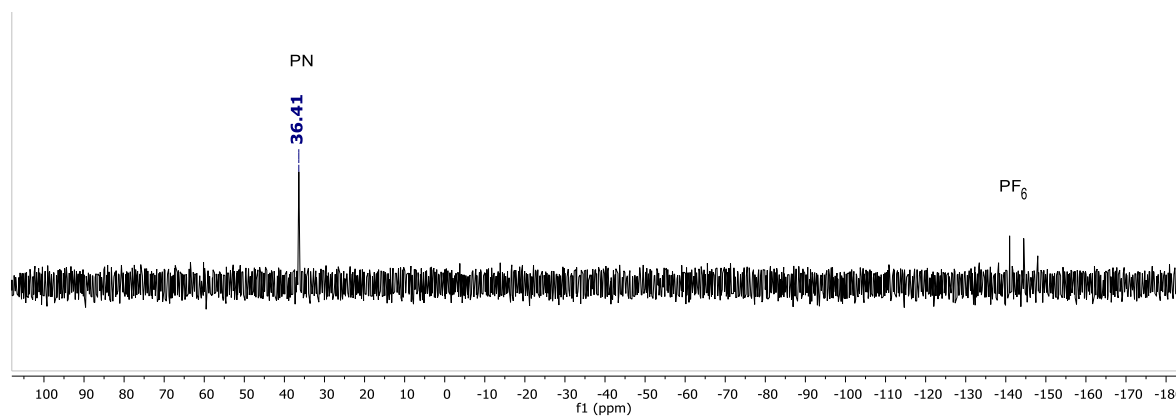

Figure S14. <sup>31</sup>P-<sup>1</sup>H} NMR spectrum for aliquot of the stock solution of compound **9** (DMSO+Tween 80+H<sub>2</sub>O), after the cytotoxic assay was completed (202 MHz).



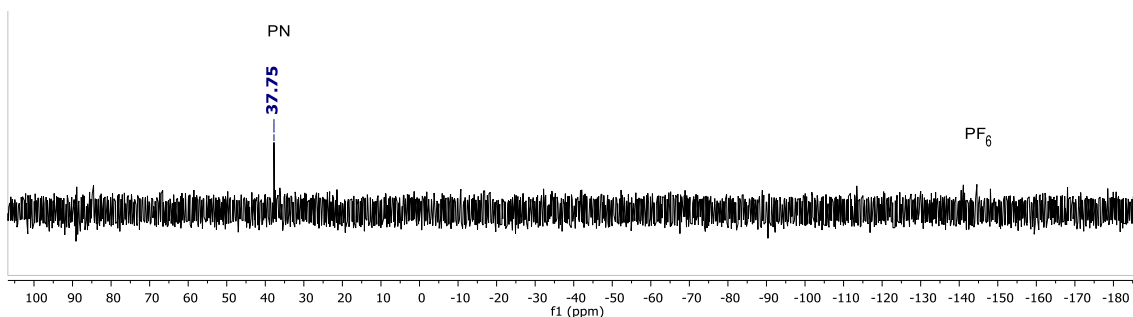

Figure S15.  $^{31}\text{P}$ - $\{^1\text{H}\}$  NMR spectrum for aliquot of the stock solution of compound **10** (DMSO+Tween 80+H<sub>2</sub>O), after the cytotoxic assay was completed (202 MHz).

## 8. Determination of the vehicle's NOAEL

Table S1. Preparation of different concentrations of the vehicle DMSO: Tween 80 to determine the NOAEL on cancer and normal cell lines

| Mixture of DMSO: Tween 80 solution (1:1 v/v) <sup>a</sup> |                                      |                                          |                                            |                                                |
|-----------------------------------------------------------|--------------------------------------|------------------------------------------|--------------------------------------------|------------------------------------------------|
| Dilution No.                                              | DMSO in stock (%v/vH <sub>2</sub> O) | Tween 80 in stock (%w/vH <sub>2</sub> O) | DMSO in the assay (%v/v <sub>assay</sub> ) | Tween 80 in the assay (%w/v <sub>assay</sub> ) |
| -                                                         | 100                                  | 0                                        | NT                                         | NT                                             |
| 1                                                         | 50                                   | 5                                        | NT                                         | NT                                             |
| 2                                                         | 1.25                                 | 0.125                                    | NT                                         | NT                                             |
| 3                                                         | 0.625                                | 0.0625                                   | 0.0625                                     | 0.00625                                        |
| 4                                                         | 0.3125                               | 0.03125                                  | 0.03125                                    | 0.003125                                       |
| 5                                                         | 0.15625                              | 0.015625                                 | 0.015625                                   | 0.0015625                                      |
| 6                                                         | 0.078125                             | 0.0078125                                | 0.0078125                                  | 0.00078125                                     |
| 7                                                         | 0.0390625                            | 0.00390625                               | 0.00390625                                 | 0.000390625                                    |
| 8                                                         | 0.01953125                           | 0.001953125                              | 0.001953125                                | 0.000195313                                    |
| 9                                                         | 0.009765625                          | 0.000976563                              | 0.000976563                                | 0.0000976563                                   |
| 10                                                        | 0.004882813                          | 0.000488281                              | 0.000488281                                | 0.0000488281                                   |
| 11                                                        | 0.002441406                          | 0.000244141                              | 0.000244141                                | 0.0000244141                                   |

<sup>a</sup>Initial concentrations of DMSO (100%v/v) and Tween 80® solution (10% w/v aqueous solution)  
 NT: Not tested in the SRB assay

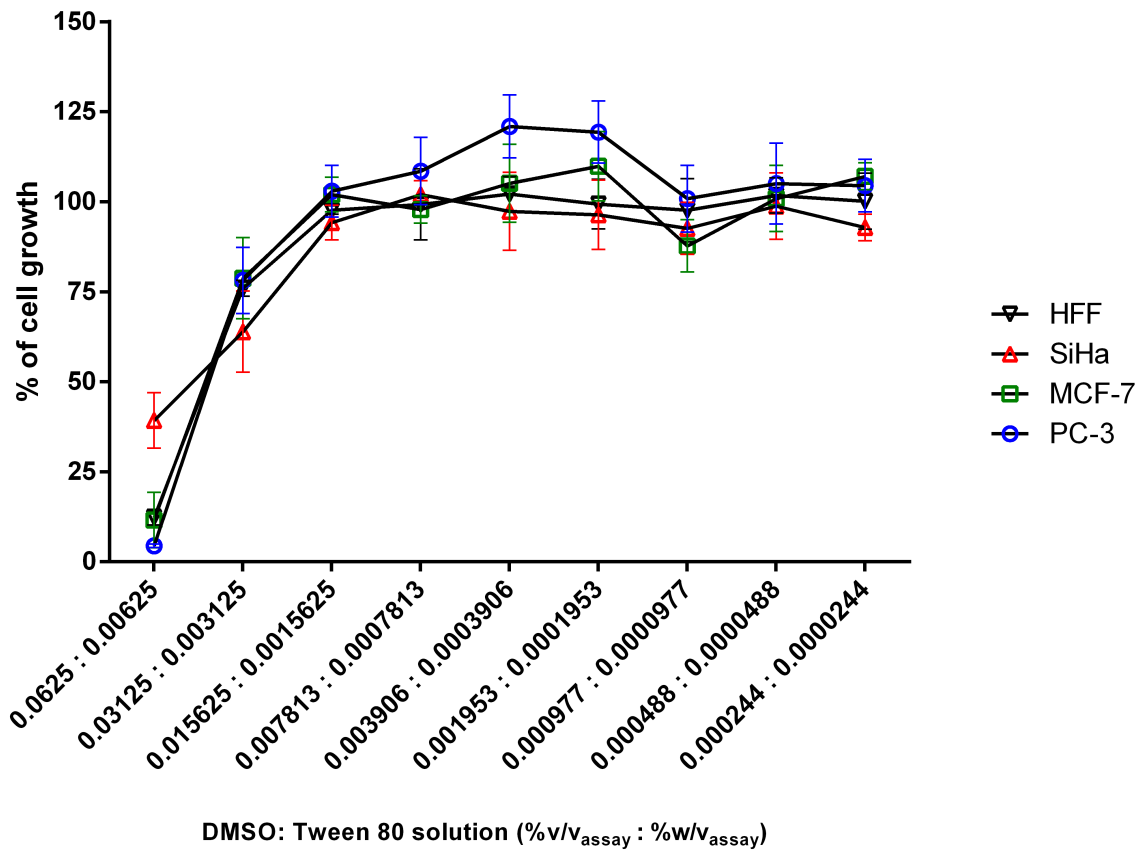

Figure S16. Determination of the Non Observable Adverse Level (NOAEL) of the vehicle DMSO: Tween 80 ® solution

9. Crystallography data for **6**, **9** and **10**.

Table S2. Crystal data and structure refinement for **6**

|                                             |                                                                      |
|---------------------------------------------|----------------------------------------------------------------------|
| Identification code                         | RuSePhCl                                                             |
| Empirical formula                           | C <sub>43</sub> H <sub>40</sub> Cl <sub>3</sub> N <sub>2</sub> PRuSe |
| Formula weight                              | 902.12                                                               |
| Temperature/K                               | 99.98(12)                                                            |
| Crystal system                              | monoclinic                                                           |
| Space group                                 | P2 <sub>1</sub> /n                                                   |
| a/Å                                         | 12.1571(3)                                                           |
| b/Å                                         | 16.3864(4)                                                           |
| c/Å                                         | 20.0229(5)                                                           |
| α/°                                         | 90                                                                   |
| β/°                                         | 94.020(2)                                                            |
| γ/°                                         | 90                                                                   |
| Volume/Å <sup>3</sup>                       | 3978.96(17)                                                          |
| Z                                           | 4                                                                    |
| ρ <sub>calc</sub> /cm <sup>3</sup>          | 1.506                                                                |
| μ/mm <sup>-1</sup>                          | 1.584                                                                |
| F(000)                                      | 1824.0                                                               |
| Crystal size/mm <sup>3</sup>                | 0.4 × 0.36 × 0.15                                                    |
| Radiation                                   | MoKα (λ = 0.71073)                                                   |
| 2θ range for data collection/°              | 5.374 to 58.438                                                      |
| Index ranges                                | -16 ≤ h ≤ 16, -21 ≤ k ≤ 22, -25 ≤ l ≤ 25                             |
| Reflections collected                       | 34326                                                                |
| Independent reflections                     | 9574 [R <sub>int</sub> = 0.0330, R <sub>sigma</sub> = 0.0349]        |
| Data/restraints/parameters                  | 9574/0/463                                                           |
| Goodness-of-fit on F <sup>2</sup>           | 1.054                                                                |
| Final R indexes [I ≥ 2σ (I)]                | R <sub>1</sub> = 0.0295, wR <sub>2</sub> = 0.0609                    |
| Final R indexes [all data]                  | R <sub>1</sub> = 0.0390, wR <sub>2</sub> = 0.0642                    |
| Largest diff. peak/hole / e Å <sup>-3</sup> | 1.06/-1.72                                                           |

Note: The compound crystallized as solvate. The crystal structure contains two solvent voids, but only in one case the atom positions corresponding to dichloromethane could be clearly identified. In the second void, corresponding to a calculated volume of 73 Å<sup>3</sup>, the solvent is disordered. Since the disorder could not be resolved, the solvent mask instruction implemented in OLEX was employed in the final refinement cycle.

Table S3. Crystal data and structure refinement for **9**

|                                                |                                                                  |
|------------------------------------------------|------------------------------------------------------------------|
| Identification code                            | RuSPh                                                            |
| Empirical formula                              | $C_{42}H_{38}F_6N_2P_2RuS$                                       |
| Formula weight                                 | 879.81                                                           |
| Temperature/K                                  | 100.0(3)                                                         |
| Crystal system                                 | triclinic                                                        |
| Space group                                    | P-1                                                              |
| a/Å                                            | 10.3583(4)                                                       |
| b/Å                                            | 11.4739(4)                                                       |
| c/Å                                            | 17.6428(6)                                                       |
| $\alpha/^\circ$                                | 102.881(3)                                                       |
| $\beta/^\circ$                                 | 93.052(3)                                                        |
| $\gamma/^\circ$                                | 111.451(4)                                                       |
| Volume/Å <sup>3</sup>                          | 1881.39(13)                                                      |
| Z                                              | 2                                                                |
| $\rho_{\text{calc}}/\text{cm}^3$               | 1.553                                                            |
| $\mu/\text{mm}^{-1}$                           | 0.622                                                            |
| F(000)                                         | 896.0                                                            |
| Crystal size/mm <sup>3</sup>                   | 0.19 × 0.14 × 0.11                                               |
| Radiation                                      | MoK $\alpha$ ( $\lambda = 0.71073$ )                             |
| 2 $\Theta$ range for data collection/ $^\circ$ | 5.356 to 58.332                                                  |
| Index ranges                                   | -12 ≤ h ≤ 14, -14 ≤ k ≤ 15, -23 ≤ l ≤ 23                         |
| Reflections collected                          | 16349                                                            |
| Independent reflections                        | 8671 [ $R_{\text{int}} = 0.0332$ , $R_{\text{sigma}} = 0.0608$ ] |
| Data/restraints/parameters                     | 8671/0/490                                                       |
| Goodness-of-fit on F <sup>2</sup>              | 1.029                                                            |
| Final R indexes [ $I \geq 2\sigma(I)$ ]        | $R_1 = 0.0372$ , $wR_2 = 0.0698$                                 |
| Final R indexes [all data]                     | $R_1 = 0.0465$ , $wR_2 = 0.0740$                                 |
| Largest diff. peak/hole / e Å <sup>-3</sup>    | 0.57/-0.68                                                       |

Table S4. Crystal data and structure refinement for **10**

|                                             |                                                                                   |
|---------------------------------------------|-----------------------------------------------------------------------------------|
| Identification code                         | RuSePh                                                                            |
| Empirical formula                           | C <sub>42</sub> H <sub>38</sub> F <sub>6</sub> N <sub>2</sub> P <sub>2</sub> RuSe |
| Formula weight                              | 926.71                                                                            |
| Temperature/K                               | 99.9(5)                                                                           |
| Crystal system                              | triclinic                                                                         |
| Space group                                 | P-1                                                                               |
| a/Å                                         | 10.3258(3)                                                                        |
| b/Å                                         | 11.4664(5)                                                                        |
| c/Å                                         | 17.7014(7)                                                                        |
| α/°                                         | 102.299(3)                                                                        |
| β/°                                         | 92.894(3)                                                                         |
| γ/°                                         | 111.556(4)                                                                        |
| Volume/Å <sup>3</sup>                       | 1885.31(13)                                                                       |
| Z                                           | 2                                                                                 |
| ρ <sub>calc</sub> /cm <sup>3</sup>          | 1.632                                                                             |
| μ/mm <sup>-1</sup>                          | 1.530                                                                             |
| F(000)                                      | 932.0                                                                             |
| Crystal size/mm <sup>3</sup>                | 0.26 × 0.23 × 0.15                                                                |
| Radiation                                   | MoKα (λ = 0.71073)                                                                |
| 2Θ range for data collection/°              | 5.318 to 58.354                                                                   |
| Index ranges                                | -13 ≤ h ≤ 12, -14 ≤ k ≤ 15, -22 ≤ l ≤ 23                                          |
| Reflections collected                       | 16267                                                                             |
| Independent reflections                     | 8622 [R <sub>int</sub> = 0.0389, R <sub>sigma</sub> = 0.0633]                     |
| Data/restraints/parameters                  | 8622/0/490                                                                        |
| Goodness-of-fit on F <sup>2</sup>           | 1.030                                                                             |
| Final R indexes [I >= 2σ (I)]               | R <sub>1</sub> = 0.0391, wR <sub>2</sub> = 0.0778                                 |
| Final R indexes [all data]                  | R <sub>1</sub> = 0.0483, wR <sub>2</sub> = 0.0826                                 |
| Largest diff. peak/hole / e Å <sup>-3</sup> | 0.93/-0.79                                                                        |

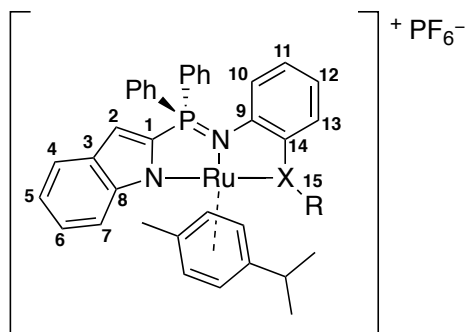

Table S5.  $^{13}\text{C}$  NMR data (ppm) for iminophosphorane ligand moieties of compounds **1**\*-**4**\*, **6**, **9**-**12** ( $\text{CDCl}_3$ ). \* Data taken from reference [1]

| Compound                       | 1                | 2                | 3                | 4     | 5      | 6     | 7      | 8               | 9     | 10              | 11    | 12    | 13    | 14              | 15/ <i>ipso</i> | <i>o</i> (XPh) | <i>m</i> (XPh) | <i>p</i> (XPh) | <i>i</i> (Ph) <sub>2</sub> | <i>o</i> (Ph) <sub>2</sub> | <i>m</i> (Ph) <sub>2</sub> | <i>p</i> (Ph) <sub>2</sub> |
|--------------------------------|------------------|------------------|------------------|-------|--------|-------|--------|-----------------|-------|-----------------|-------|-------|-------|-----------------|-----------------|----------------|----------------|----------------|----------------------------|----------------------------|----------------------------|----------------------------|
| <b>1</b> *<br>( <i>J</i> = Hz) | 131.2<br>(11)    | 111.8<br>(16)    | 128.4<br>(13)    | 121.7 | 120.6  | 124.4 | 112.3  | 138.1<br>(9)    | 149.9 | 121.1<br>(10)   | 118.5 | 128.1 | 126.2 | 132.0<br>(11)   | 137.1           | 130.2          | 129.1          | 132.1          | 129.7<br>(99)              | 132.6<br>(10.7)            | 128.8<br>(12)              | 132.3<br>(3)               |
| <b>9</b><br>( <i>J</i> = Hz)   | 130.9<br>(145.2) | 111.6<br>(23.1)  | 131.4<br>(14.0)  | 121.8 | 118.8  | 122.5 | 115.8  | 147.3<br>(14.8) | 155.6 | 124.9           | 131.2 | 122.7 | 134.5 | 127.4<br>(8.4)  | 126.9           | 128.2          | 128.4          | 128.6          | 127.5<br>(115.7)           | 132.5<br>(11)              | 130.2<br>(13)              | 134.8                      |
| <b>2</b><br>( <i>J</i> = Hz)   | 129.3<br>(6)     | 112.4<br>(20.4)  | 128.5            | 121.8 | 120.8  | 124.6 | 112.2  | 138.4<br>(8)    | 150.7 | 120.7<br>(10.8) | 119.0 | 129.5 | 126.8 | 130.3<br>(34)   | 130.7           | 135.6          | 127.9          | 129.5          | 131.2<br>(93)              | 132.6<br>(11)              | 128.9<br>(13.2)            | 132.4                      |
| <b>6</b><br>( <i>J</i> = Hz)   | 131.4<br>(148)   | 111.1<br>(24)    | 131.3<br>(12)    | 121.7 | 118.8  | 122.6 | 117.1  | 147.9<br>(14)   | 155.5 | 124.6<br>(4)    | 130.9 | 122.0 | 134.3 | 125.9<br>(10)   | 126.9           | 129.5          | 128.1          | 128.2          | 128.3<br>(112.3)           | 134.7<br>(11)              | 130.1<br>(13.3)            | 134.5<br>(2.3)             |
| <b>10</b><br>( <i>J</i> = Hz)  | 131.7<br>(148.2) | 111.1<br>(23.8)  | 131.5<br>(12.7)  | 121.9 | 118.8  | 122.1 | 116.3  | 147.9<br>(15)   | 155.5 | 125.1<br>(4.5)  | 131.3 | 122.7 | 134.1 | 125.6<br>(10.2) | 126.5           | 129.2          | 128.4          | 128.4          | 127.0<br>(132.6)           | 134.8<br>(11)              | 130.2<br>(13)              | 134.5<br>(2.5)             |
| <b>3</b> *<br>( <i>J</i> = Hz) | 132.4<br>(2.0)   | 112.0<br>(15.0)  | 128.5            | 121.7 | 120.7  | 124.4 | 112.3  | 138.2<br>(8.3)  | 147.0 | 119.7<br>(9.3)  | 118.8 | 124.6 | 123.7 | 133.6<br>(22.6) | 14.6            | —              | —              | —              | 130.9<br>(100)             | 132.6<br>(10.8)            | 128.8<br>(12.5)            | 132.2<br>(2.9)             |
| <b>11</b><br>( <i>J</i> = Hz)  | 131.8            | 111.9            | 133.8            | 122.3 | 119.4  | 123.9 | 115.7  | 148.8           | 154.3 | 124.8<br>(4.6)  | 130.7 | 122.5 | 131.1 | 130.1<br>(13.7) | 24.1            | —              | —              | —              | 126.7<br>(114.8)           | 134.43<br>(10.6)           | 130.38<br>(13.6)           | 134.77<br>(2.9)            |
| <b>4</b> *<br>( <i>J</i> = Hz) | 132.4<br>(3.0)   | 112.4<br>(16.0)  | 128.4<br>(12)    | 121.8 | 120.8  | 124.6 | 112.3  | 138.3<br>(5.3)  | 148.3 | 119.3<br>(15)   | 119.0 | 125.4 | 126.2 | 133.5<br>(15)   | 4.5             | —              | —              | —              | 124.1<br>(86.5)            | 132.91<br>(10.6)           | 129.39<br>(12.3)           | 134.57<br>(2.74)           |
| <b>12</b><br>( <i>J</i> = Hz)  | 133.6<br>(146)   | 111.66<br>(28.0) | 131.53<br>(12.3) | 122.1 | 119.46 | 123.7 | 115.82 | 148.8<br>(14.8) | 154.2 | 125.01<br>(4.6) | 130.4 | 122.3 | 132.4 | 127.44<br>(9.6) | 13.72           | —              | —              | —              | 127.1<br>(113.5)           | 134.35<br>(10.5)           | 130.31<br>(13.3)           | 134.68<br>(2.7)            |
|                                |                  |                  |                  |       |        |       |        |                 |       |                 |       |       |       |                 |                 | —              | —              | —              | 124.09<br>(86.2)           | 132.83<br>(11.6)           | 129.32<br>(12.1)           | 134.47<br>(2.3)            |

Table S6.  $^1\text{H}$  NMR data (ppm) for iminophosphorane moiety of compounds **1\*–4\***, **6**, **9–12** ( $\text{CDCl}_3$ ). \* Data taken from reference [1]

|                      | 2           | 4             | 5                 | 6                 | 7              | 10            | 11                  | 12                    | 13                | 15/ ipso (XPh) | m (XPh)   | p (XPh)   | o (Ph) <sub>2</sub>    | m (Ph) <sub>2</sub>    | p (Ph) <sub>2</sub>    | NH   |
|----------------------|-------------|---------------|-------------------|-------------------|----------------|---------------|---------------------|-----------------------|-------------------|----------------|-----------|-----------|------------------------|------------------------|------------------------|------|
| <b>1*</b><br>(J= Hz) | 6.71<br>(4) | 7.59<br>(8)   | 7.12<br>(8.0)     | 7.25/7.29         | 7.36/7.41      | 6.58<br>(8)   | 6.65<br>(8/8)       | 6.90<br>(7.6/7.6/1.4) | 7.17–7.21         | 7.36/7.42      | 7.26/7.29 | 7.17/7.21 | 7.74/7.79              | 7.44/7.48              | 7.54/7.57              | 9.19 |
| <b>9</b><br>(J= Hz)  | 6.69/6.7    | 7.36<br>(7.5) | 6.69/6.79         | 6.95              | 7.01           | 6.59/6.64     | 6.86                | 6.77                  | 7.25              | 6.54/6.55      | 6.59/6.64 | 6.69/6.74 | 8.12/8.15<br>7.38/7.44 | 7.80/7.86<br>7.28/7.32 | 7.80/7.86<br>7.56/7.64 | None |
| <b>2*</b><br>(J= Hz) | 6.59        | 7.61<br>(8.0) | 7.12              | 7.27              | 7.42           | 6.49<br>(7.2) | 6.54<br>(7.2/8.0)   | 6.81<br>(8.0)         | 6.78              | 7.64/7.72      | 7.27/7.35 | 7.52/7.54 | 7.80/7.85              | 7.41/7.47              | 7.64/7.72              | 9.4  |
| <b>6</b><br>(J= Hz)  | 6.54        | 7.41<br>(7.5) | 6.76/6.73         | 6.89<br>(7.5/7.5) | 6.67/6.72      | 7.33          | 6.82<br>(7.0/7.0)   | 7.05/7.11             | 7.61              | 6.50/6.25      | 6.72/6.67 | 6.38/6.62 | 8.06/8.10<br>7.38/7.44 | 7.75/7.83<br>7.28/7.32 | 7.75/7.83<br>7.56/7.64 | None |
| <b>10</b><br>(J= Hz) | 6.73/6.79   | 7.37<br>(8.0) | 6.73/6.79         | 7.15<br>(8.0/8.0) | 7.06<br>(8.0)  | 6.56          | 6.95<br>(7.5/7.5)   | 6.87<br>(7.5/7.5)     | 7.08<br>(7.5/7.5) | 6.40/6.42      | 6.53/6.55 | 6.72/6.79 | 8.07/8.13<br>7.40/7.45 | 7.79/7.83<br>7.30/7.33 | 7.79/7.83<br>7.53/7.60 | None |
| <b>3*</b><br>(J= Hz) | 6.78<br>3.6 | 7.61<br>(8.0) | 7.26<br>(8.0/7.2) | 7.12<br>(7.2/8)   | 7.42<br>(7.47) | 6.43<br>(8.8) | 6.71/6.74           | 6.71/6.74             | 7.03/7.05         | 2.47           | _____     | _____     | 7.81/7.87              | 7.42/7.47              | 7.51/7.55              | 9.69 |
| <b>11</b><br>(J= Hz) | 6.85        | 7.64<br>(8.0) | 7.03              | 7.30              | 7.41<br>(8.0)  | 6.38<br>(8.0) | 6.77<br>(7.0/8.0/1) | 6.69<br>(7.0/7.6)     | 7.35<br>(7.6)     | 1.27           | _____     | _____     | 8.16/8.22<br>7.52/7.32 | 7.85/7.8<br>6.97/7.03  | 7.85/7.87<br>7.55      | None |
| <b>4*</b><br>(J= Hz) | 6.80        | 7.61<br>(8.0) | 7.26<br>8.0/7.2)  | 7.09/7.14         | 7.42<br>7.46   | 6.41<br>6.6   | 6.91/6.77           | 6.91/6.77             | 7.09/7.14         | 2.28           | _____     | _____     | 7.2/7.87               | 7.42/7.46              | 7.51/7.53              | 9.53 |
| <b>12</b><br>(J= Hz) | 6.84        | 7.60<br>(8.0) | 6.94/7.01         | 7.25/7.30         | 7.37<br>(8.0)  | 6.46<br>(8.0) | 6.76<br>(7.0/8.0)   | 6.65<br>(8.0/8.0)     | 7.41<br>(8.0)     | 1.02           | _____     | _____     | 8.16/8.20<br>7.25/7.30 | 7.84/7.87<br>6.94/7.01 | 7.84/7.87<br>7.51/7.55 | None |

Table S7.  $^1\text{H}$  and  $^{13}\text{C}$  NMR data (ppm) for Cymene moiety of complexes **6**, **9–12** ( $\text{CDCl}_3$ )

|                      | Me (iPr)      |                 | Me (iPr)      |                 | Me           |                 | CH (iPr)     |                 | CH            |                 | CH            |                 | CH            |                 | CH            |                 | C*              |                 | C* |  |
|----------------------|---------------|-----------------|---------------|-----------------|--------------|-----------------|--------------|-----------------|---------------|-----------------|---------------|-----------------|---------------|-----------------|---------------|-----------------|-----------------|-----------------|----|--|
|                      | $^1\text{H}$  | $^{13}\text{C}$ | $^1\text{H}$  | $^{13}\text{C}$ | $^1\text{H}$ | $^{13}\text{C}$ | $^1\text{H}$ | $^{13}\text{C}$ | $^1\text{H}$  | $^{13}\text{C}$ | $^1\text{H}$  | $^{13}\text{C}$ | $^1\text{H}$  | $^{13}\text{C}$ | $^1\text{H}$  | $^{13}\text{C}$ | $^{13}\text{C}$ | $^{13}\text{C}$ |    |  |
| <b>9</b><br>(J= Hz)  | 0.69<br>(6.0) | 20.30           | 0.88<br>(7.0) | 23.70           | 1.34         | 18.1            | 2.49         | 30.50           | 4.71<br>(5.0) | 87.26           | 5.73<br>(5.0) | 85.22           | 5.98          | 86.91           | 5.98          | 85.31           | 105.80          | 108.80          |    |  |
| <b>6</b><br>(J= Hz)  | 0.66<br>(6.5) | 20.80           | 0.74<br>(6.0) | 23.50           | 1.43         | 18.30           | 2.51         | 30.70           | 5.11          | 86.60           | 5.67          | 84.10           | 6.08          | 85.60           | 6.40          | 86.50           | 104.00          | 109.00          |    |  |
| <b>10</b><br>(J= Hz) | 0.67<br>(7.0) | 20.70           | 0.78<br>(6.5) | 23.40           | 1.39         | 18.10           | 2.41         | 30.80           | 4.95<br>(5.5) | 86.10           | 5.69<br>(6.0) | 84.10           | 5.92          | 85.10           | 5.92          | 84.90           | 103.80          | 108.80          |    |  |
| <b>11</b><br>(J= Hz) | 0.63<br>(6.8) | 18.00           | 0.85<br>(7.2) | 23.52           | 1.38         | 17.00           | 2.36         | 30.77           | 4.89<br>(6.0) | 87.40           | 5.65<br>(5.6) | 84.90           | 5.80<br>(6.0) | 86.60           | 5.87<br>(6.8) | 85.81           | 104.90          | 109.60          |    |  |
| <b>12</b><br>(J= Hz) | 0.64<br>(7.0) | 20.51           | 0.84<br>(7.0) | 23.80           | 1.38         | 18.10           | 2.39         | 30.00           | 4.88<br>(5.5) | 86.50           | 5.56<br>(6.0) | 84.10           | 5.78<br>(6.0) | 85.30           | 5.86<br>(6.0) | 84.60           | 104.20          | 108.30          |    |  |

[1] C. G. Martínez-De-León, A. Rodríguez-Álvarez, A. Flores-Parra and J-M. Grévy, *Inorg. Chim. Acta*, 2019, **495**, 118945.
